# Supplementary material
Source: HighWire-hosted journal article supplement (https://www.life-science-alliance.org/content/6/7/e202201740/F5)

1A

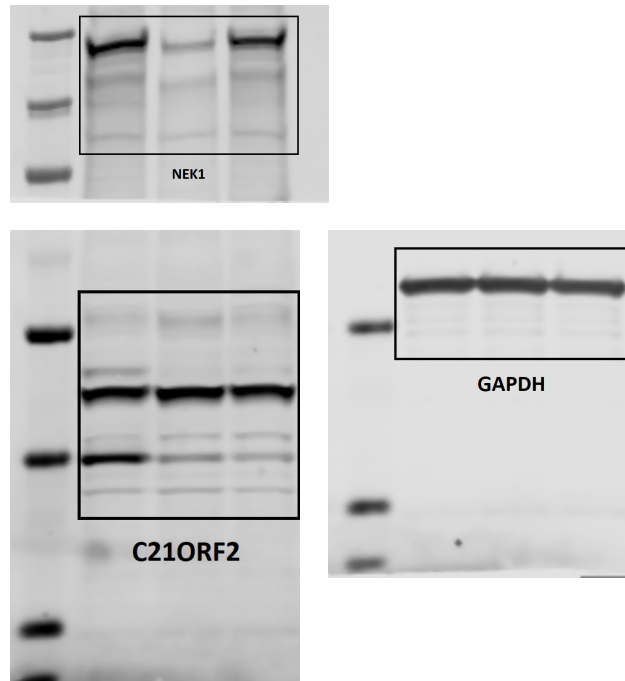

1B

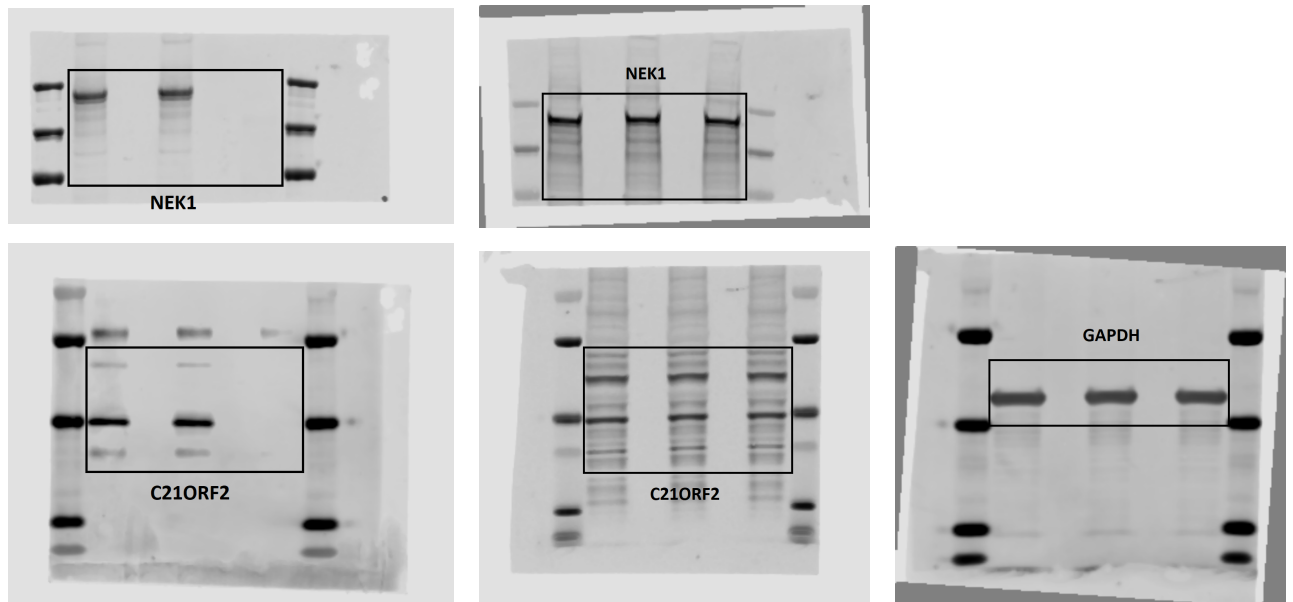

1C

WT

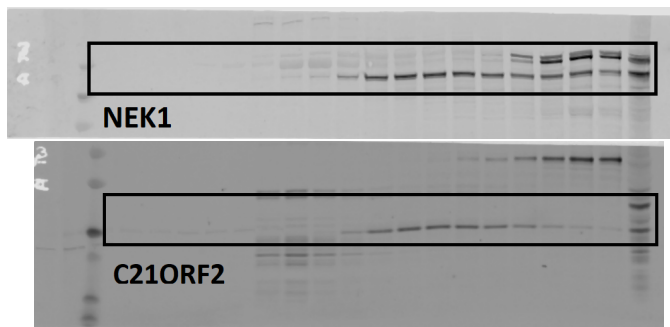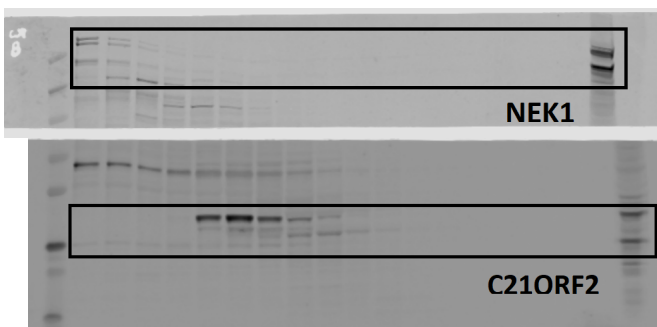

NEK1 KO

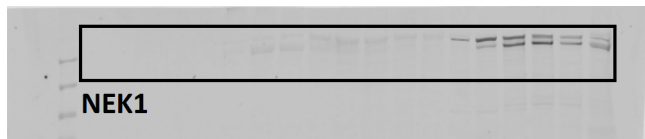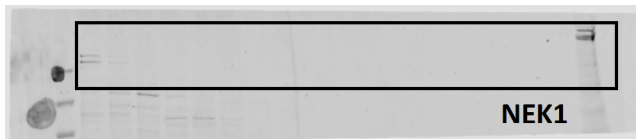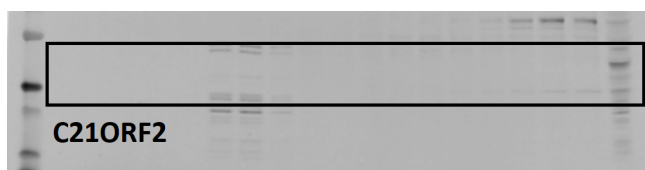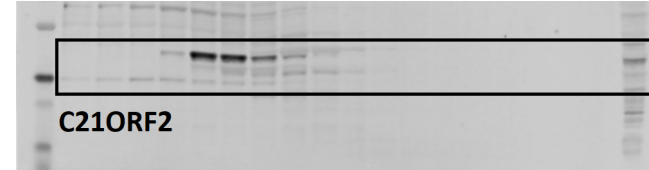

C21ORF2 KO

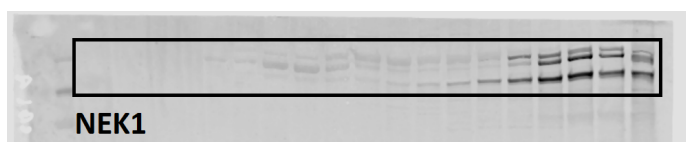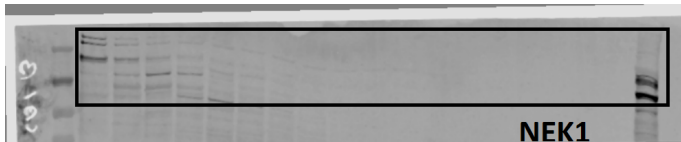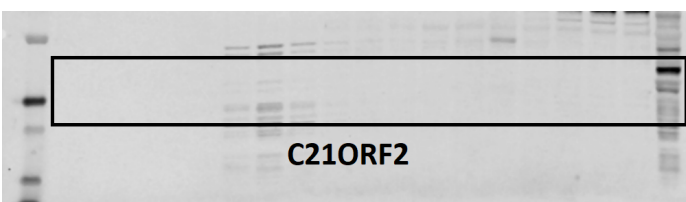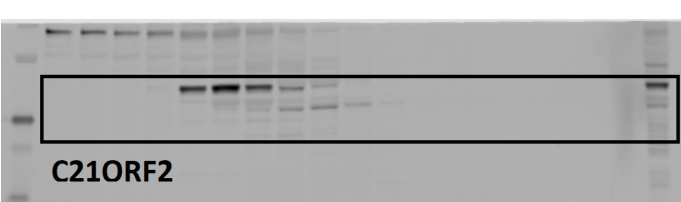

1D

Extracts

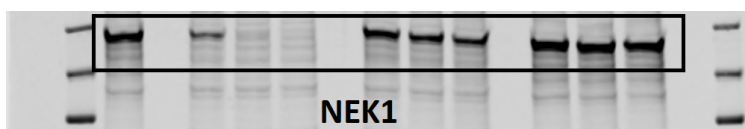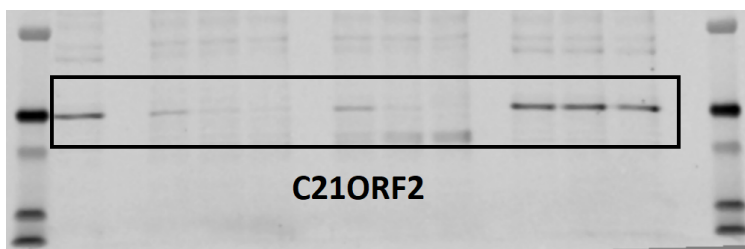

Beads

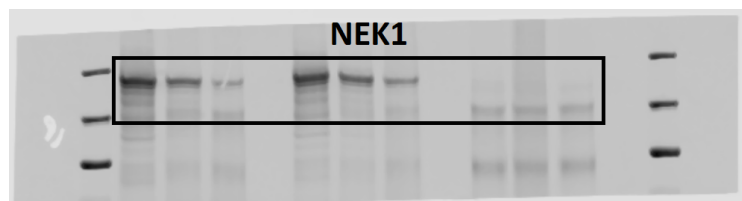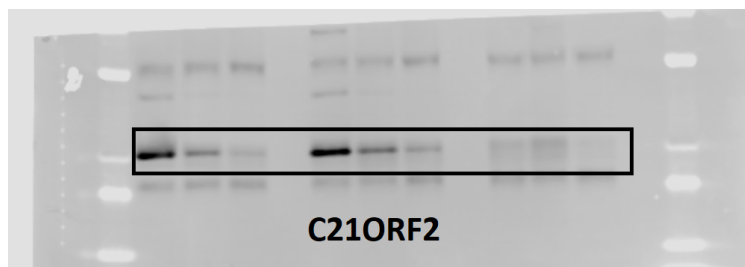

3A

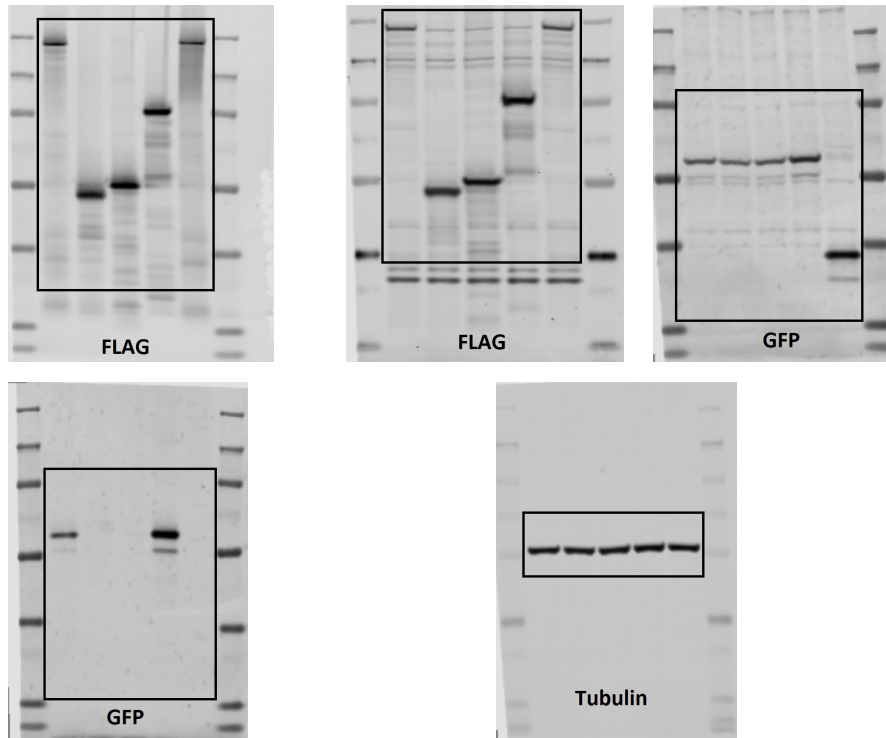

3B

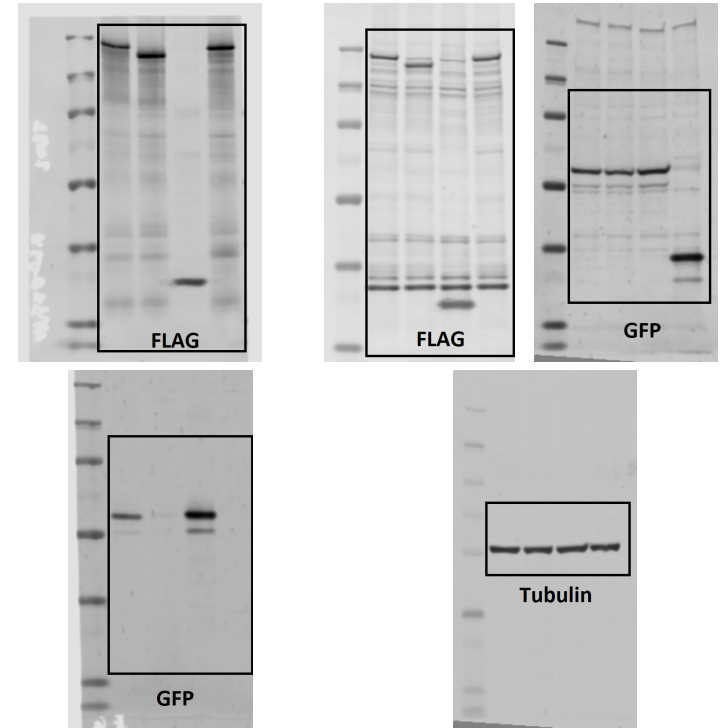

3C

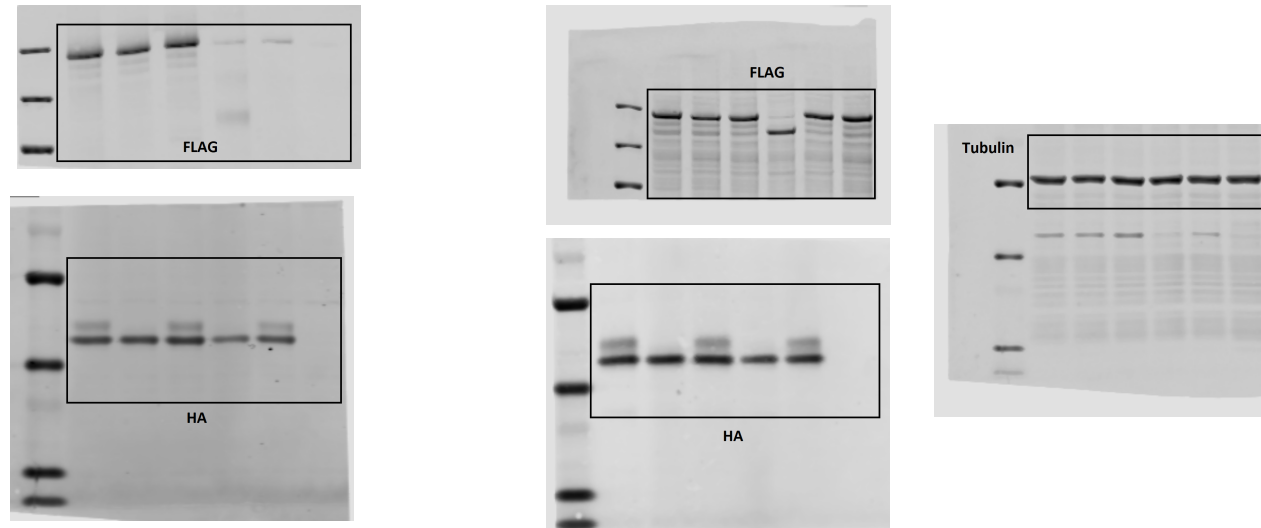

4D

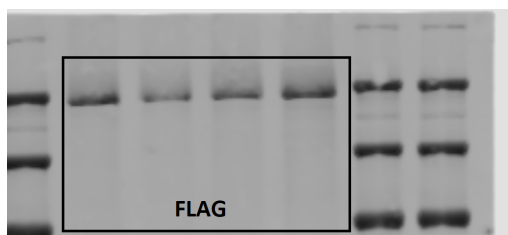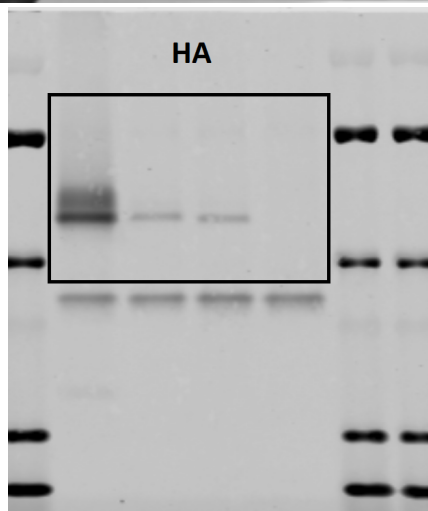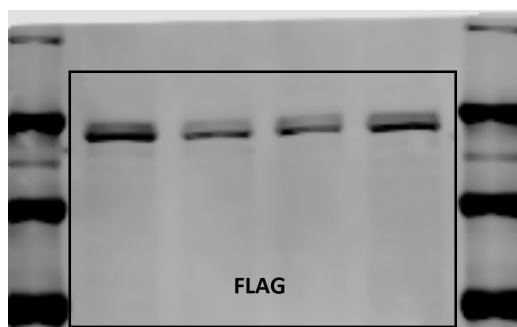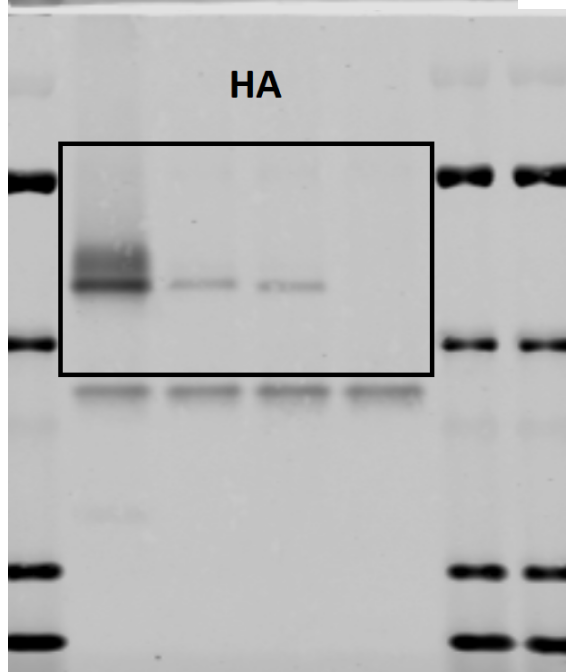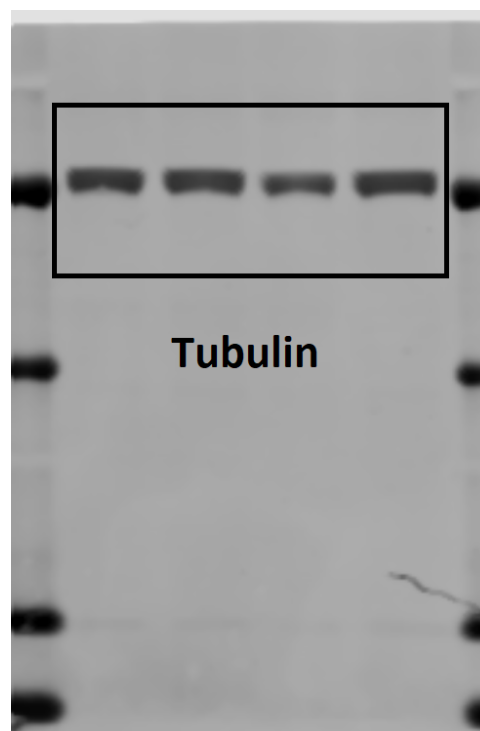

## S2A and S2B

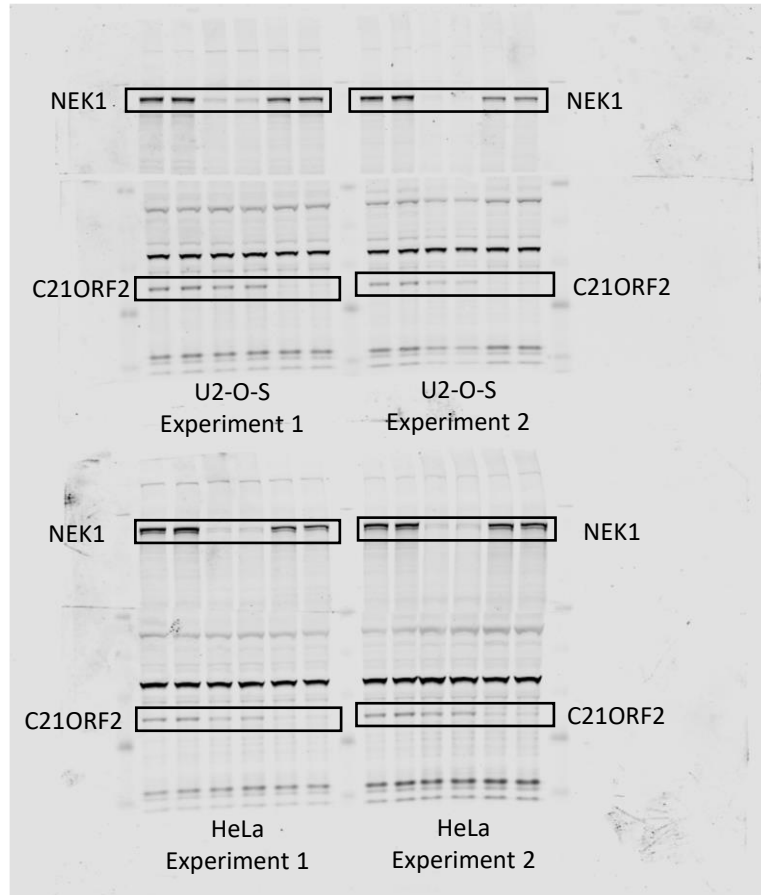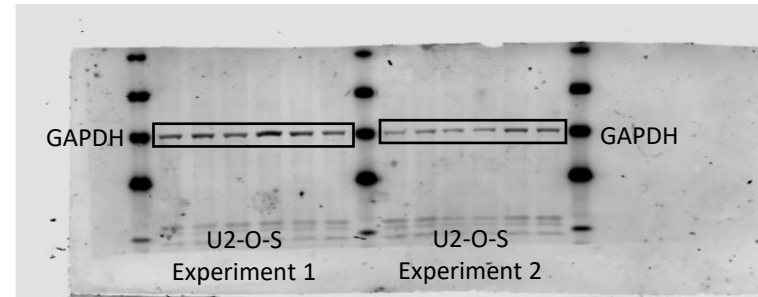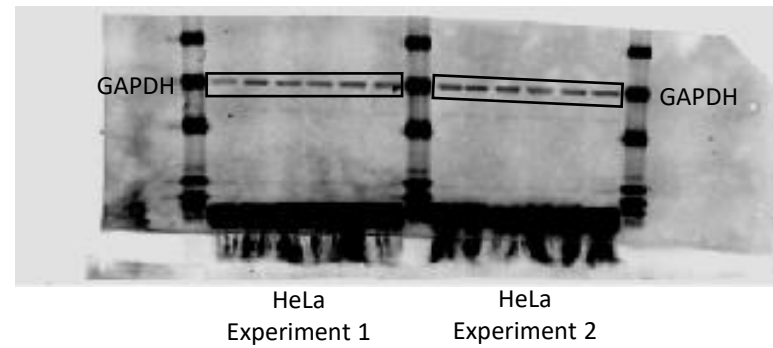

S2C MG-132

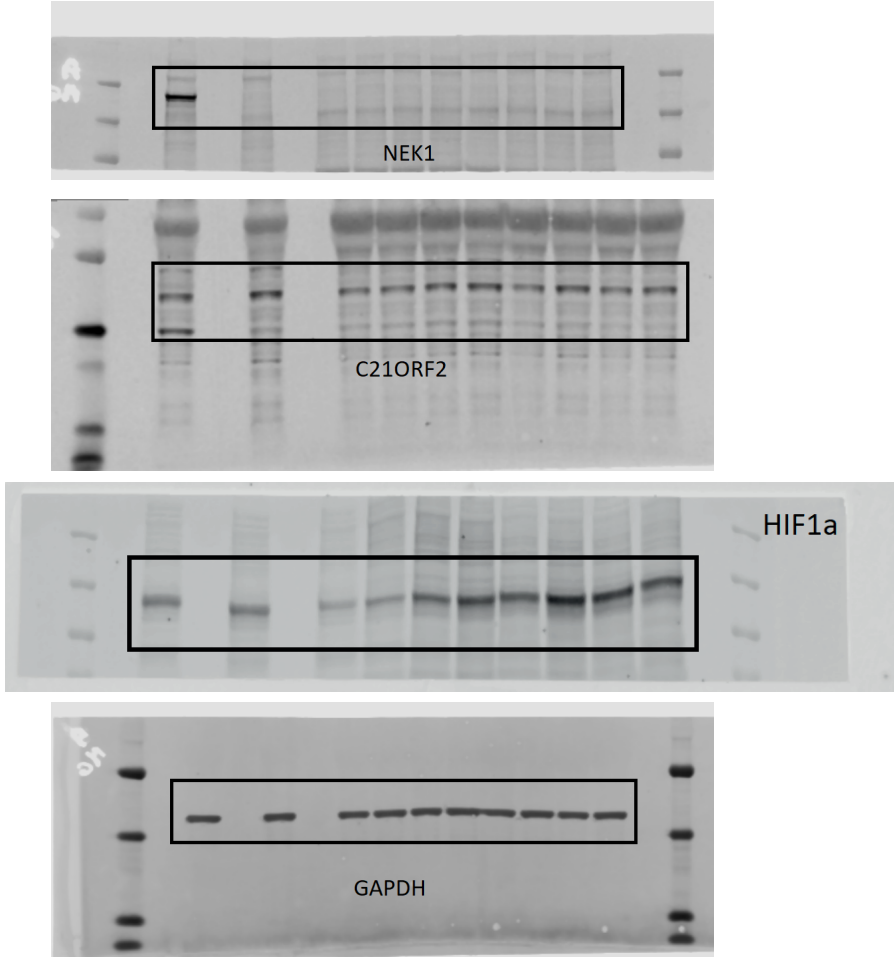

S2D MLN-4792

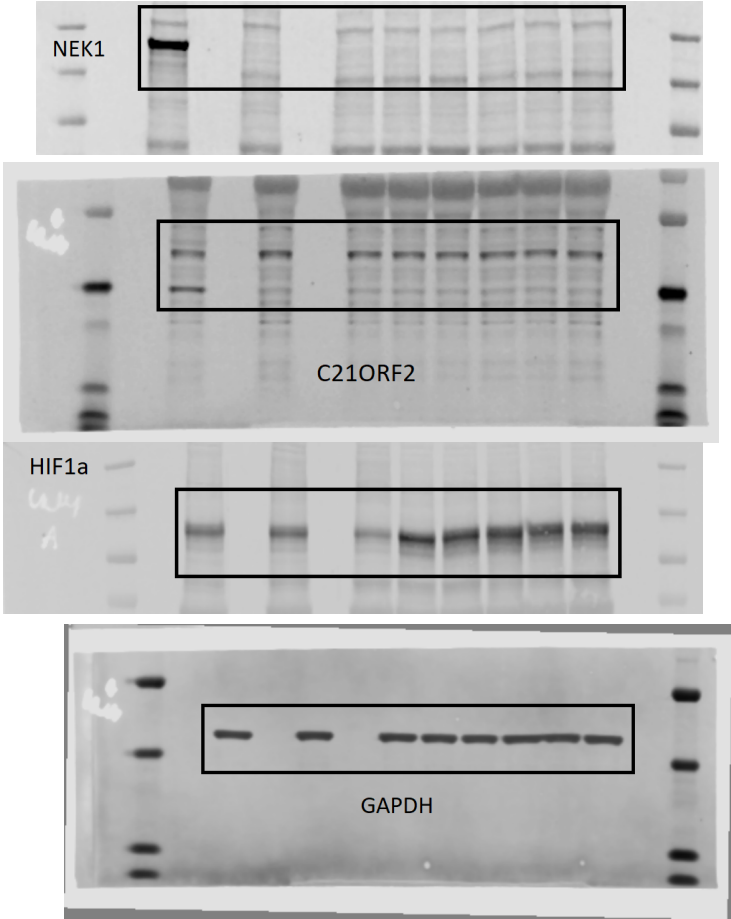

S2E BafA1

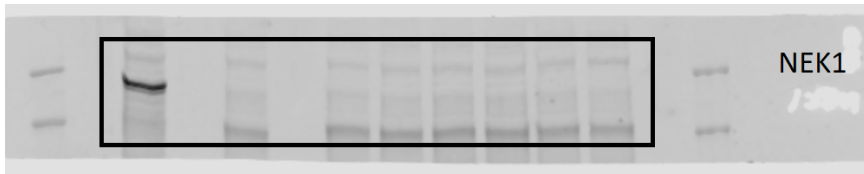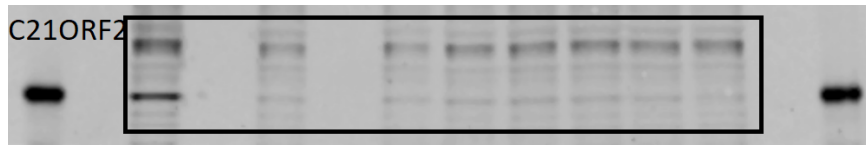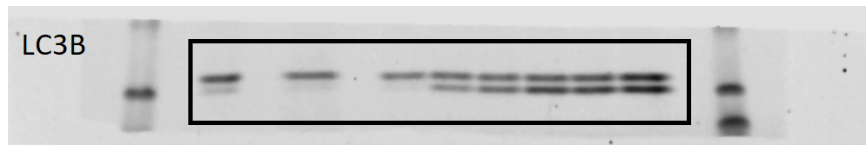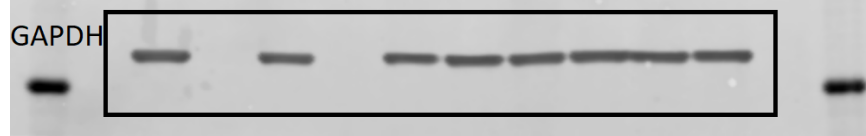

S2F MRT68921

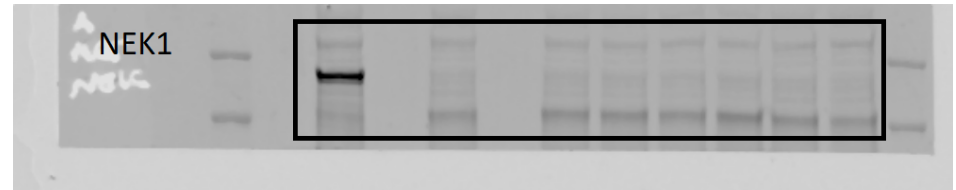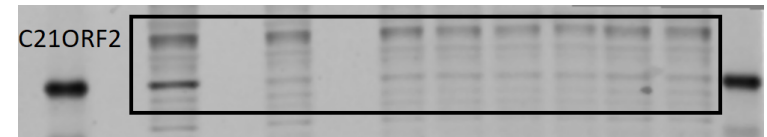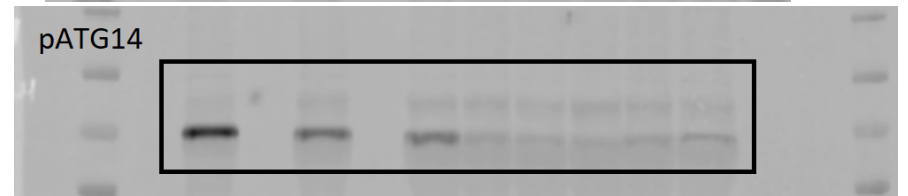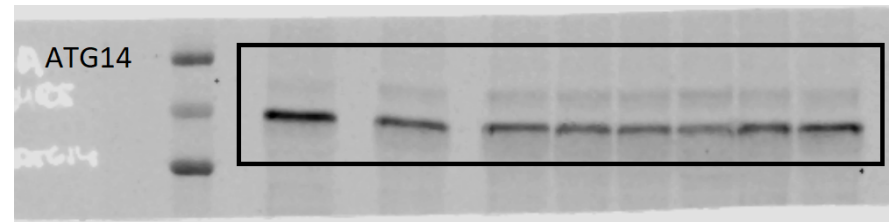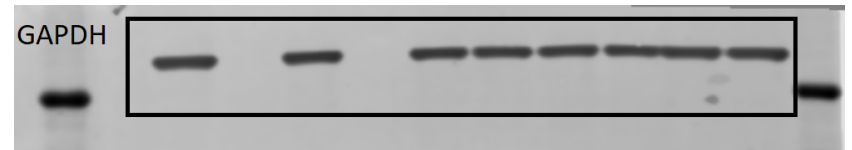

S3A

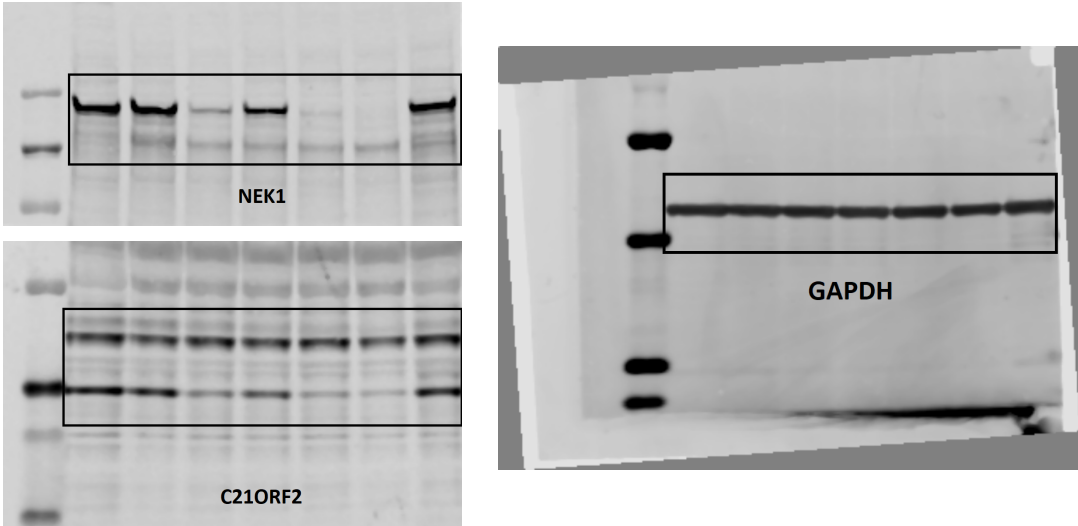

S3B

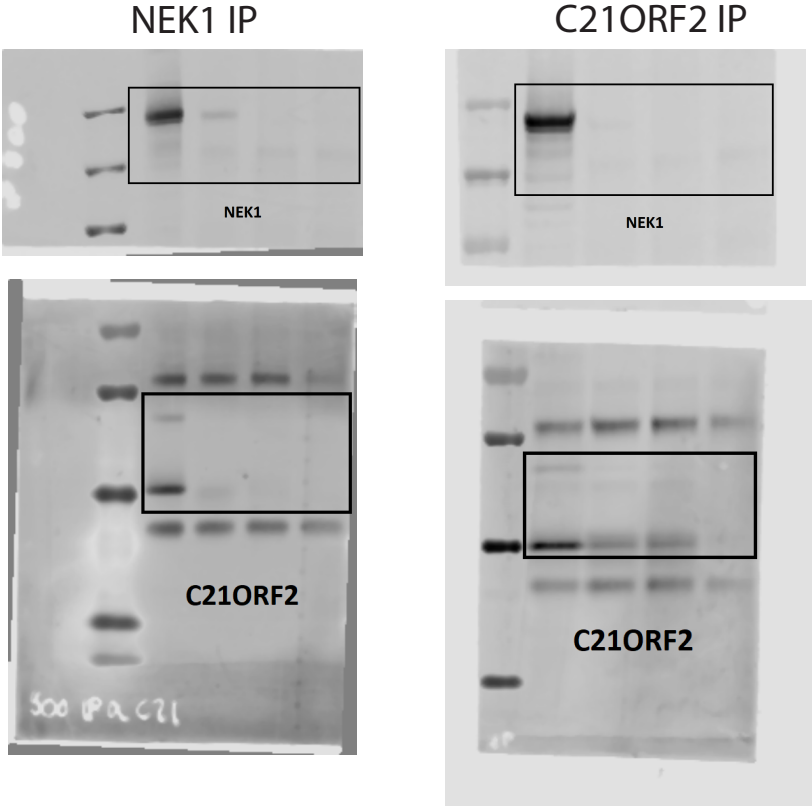

Input

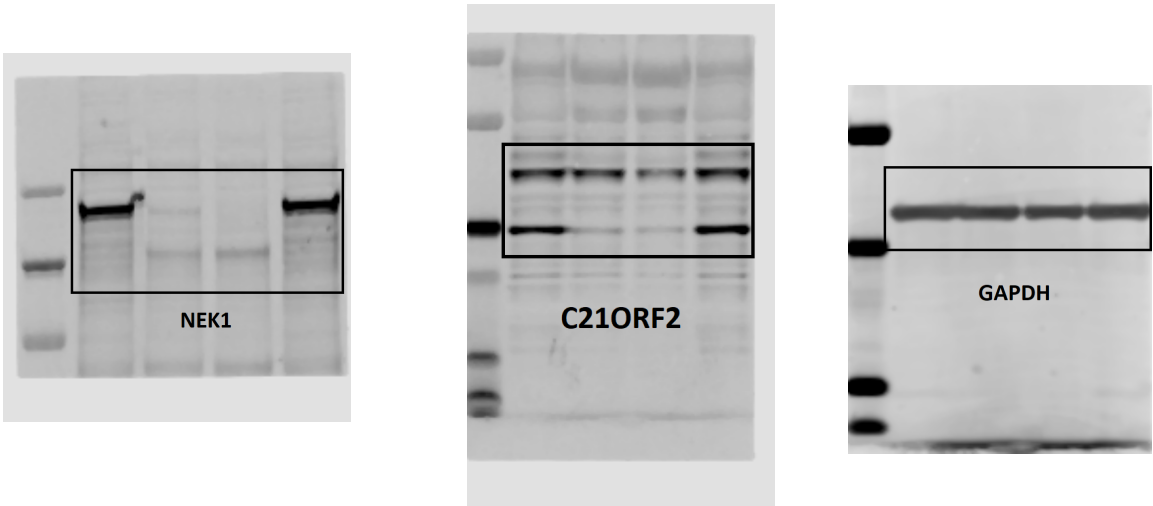



S4A

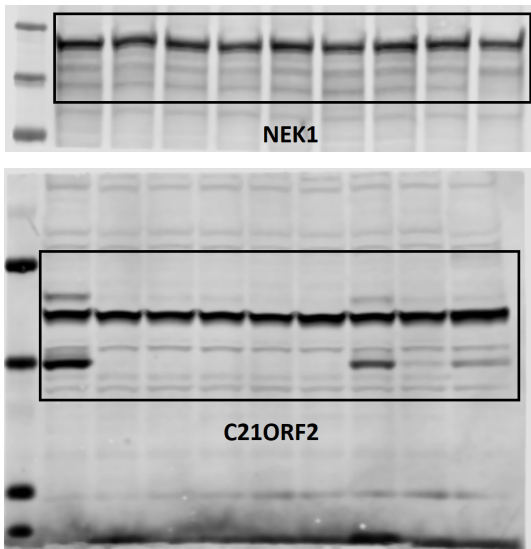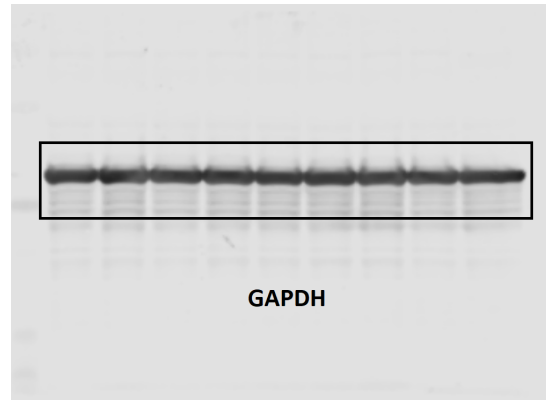

S4B

C21ORF2 IP

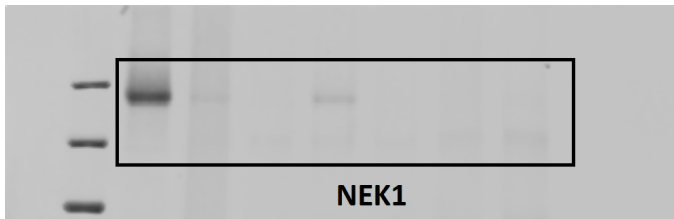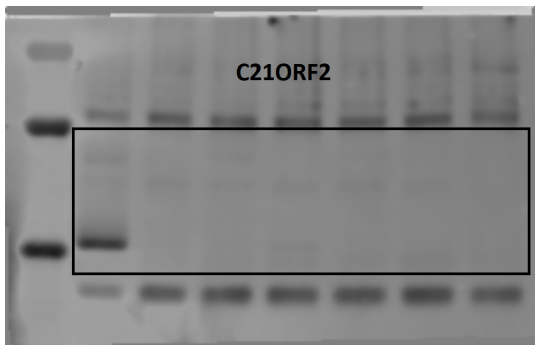

NEK1 IP

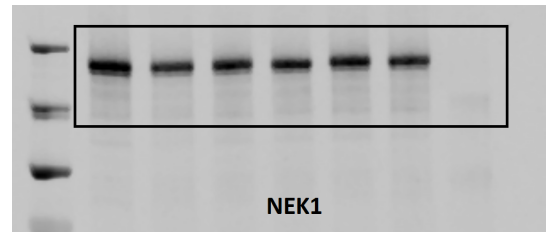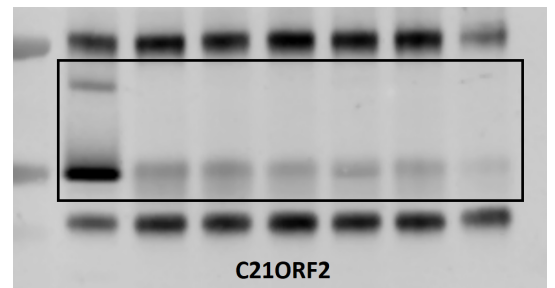

Input

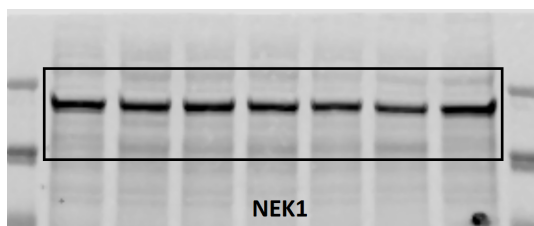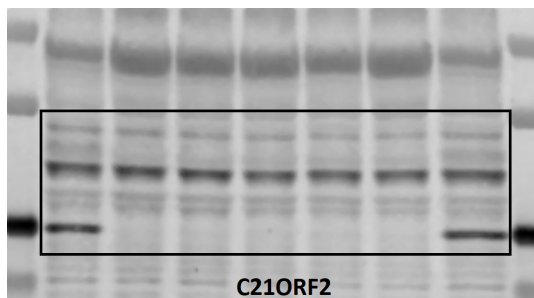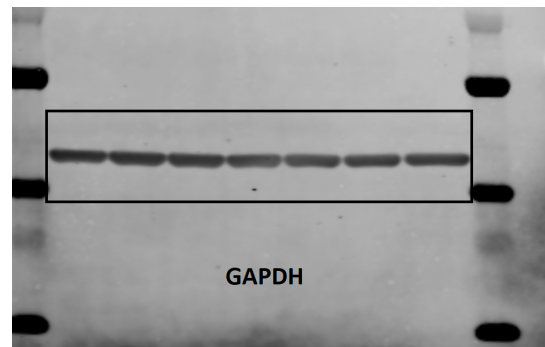

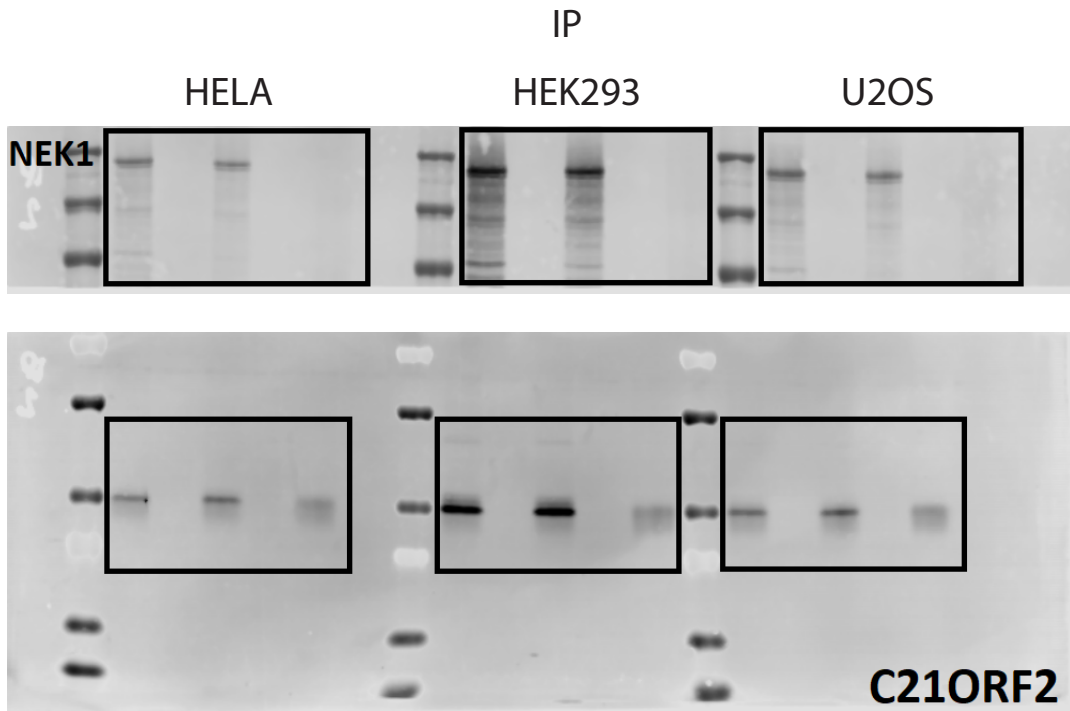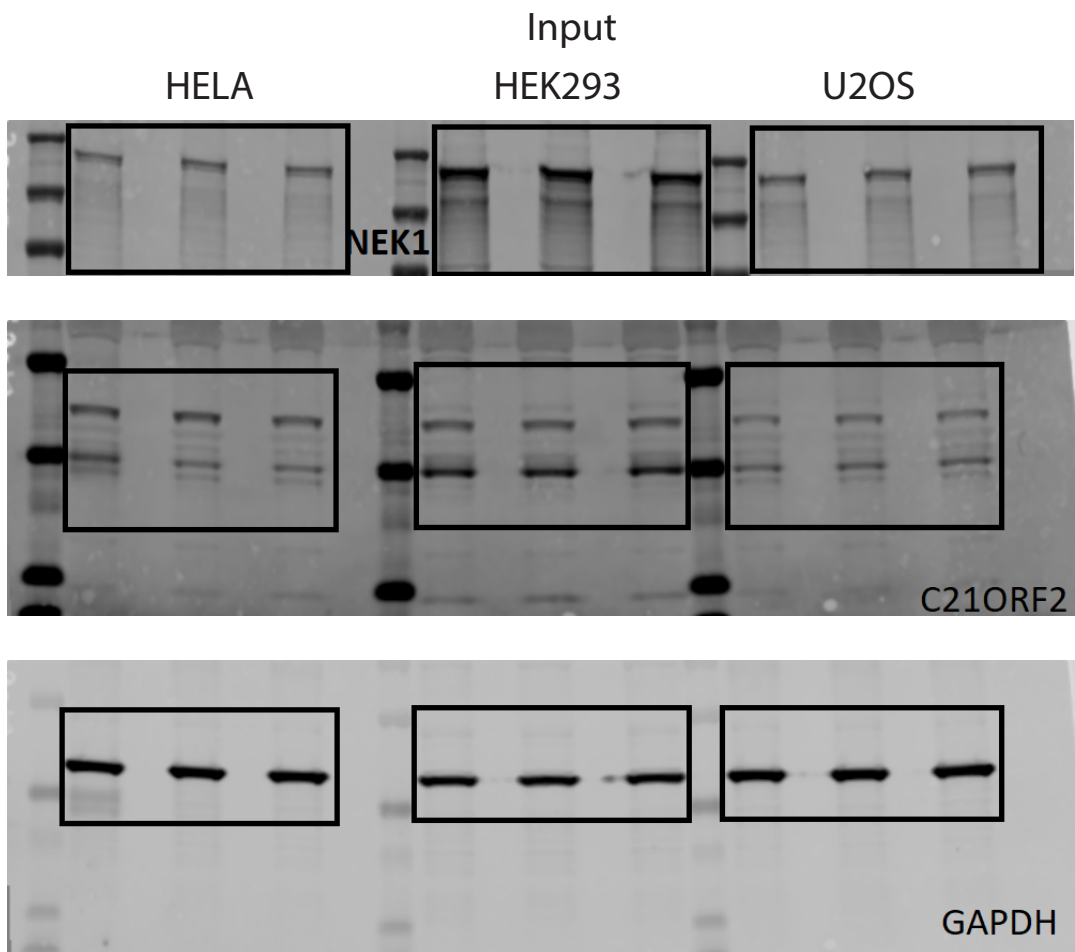

S6C

FLAG IP

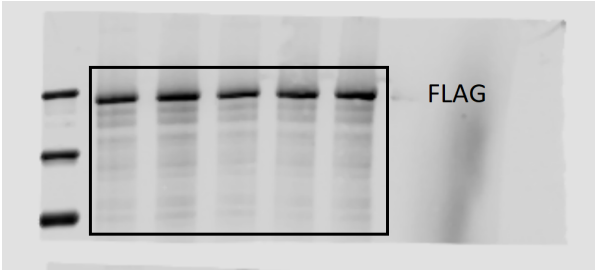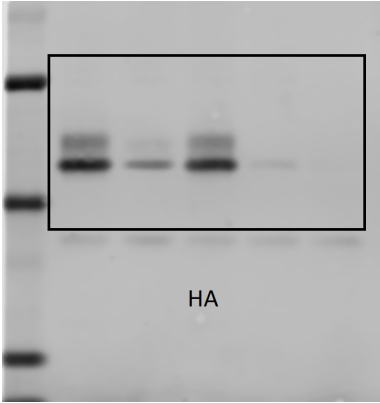

HA IP

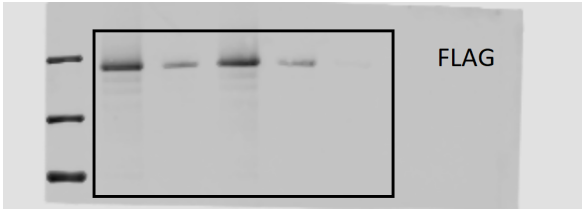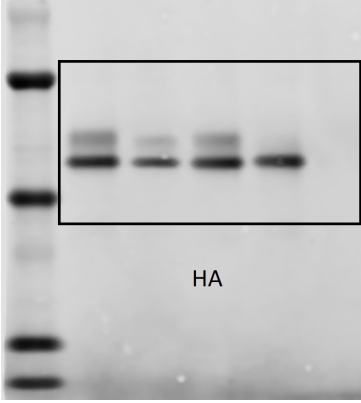

Input

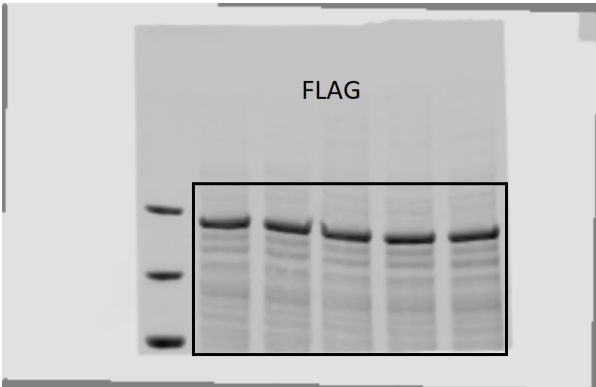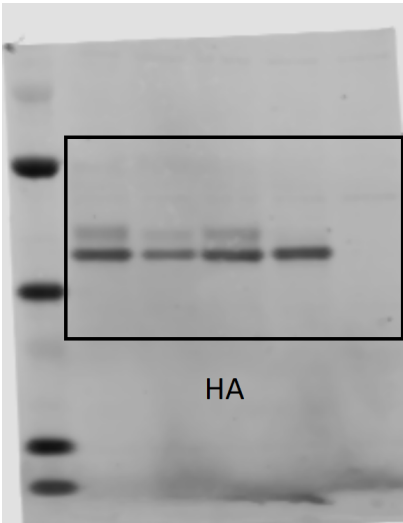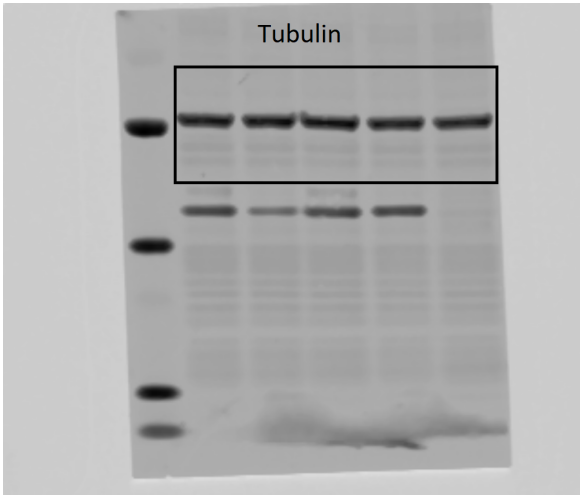

S7B

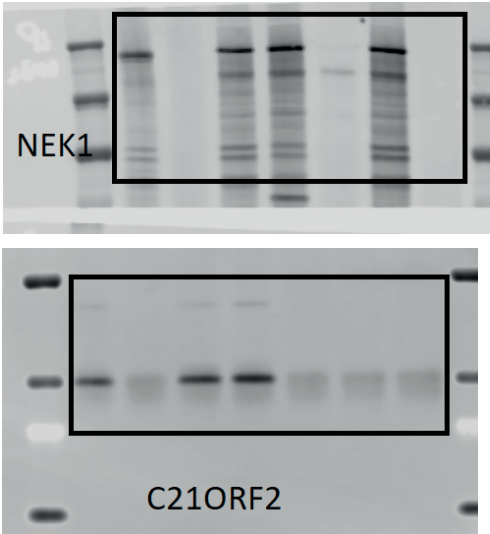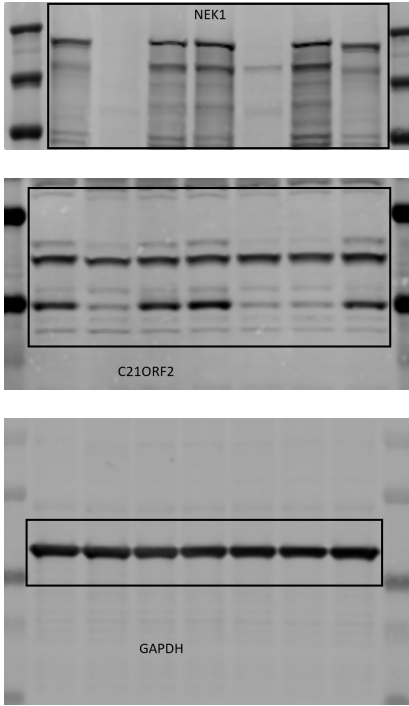

S7C

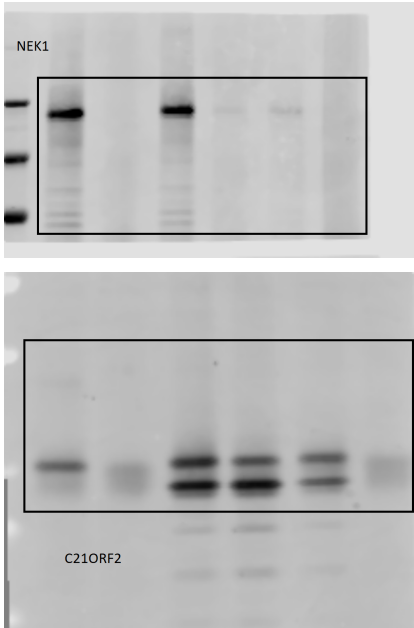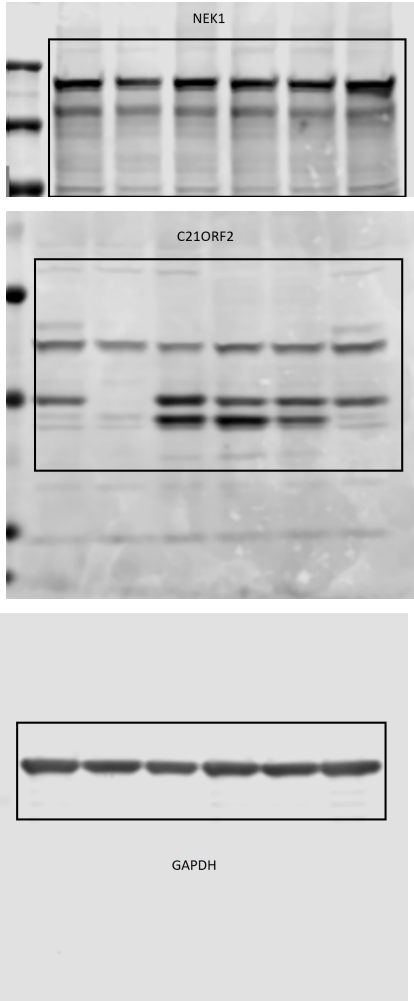

Supplement: inline-supplementary-material-5 [file inline-supplementary-material-5.pdf]
